# Supplementary material for: Interleukin-15 is required for immunosurveillance and immunoprevention of HER2/neu-driven mammary carcinogenesis
Source: Springer Nature journal article supplement (doi:10.1186/s13058-015-0588-x), 2015-05-21

Figure S3

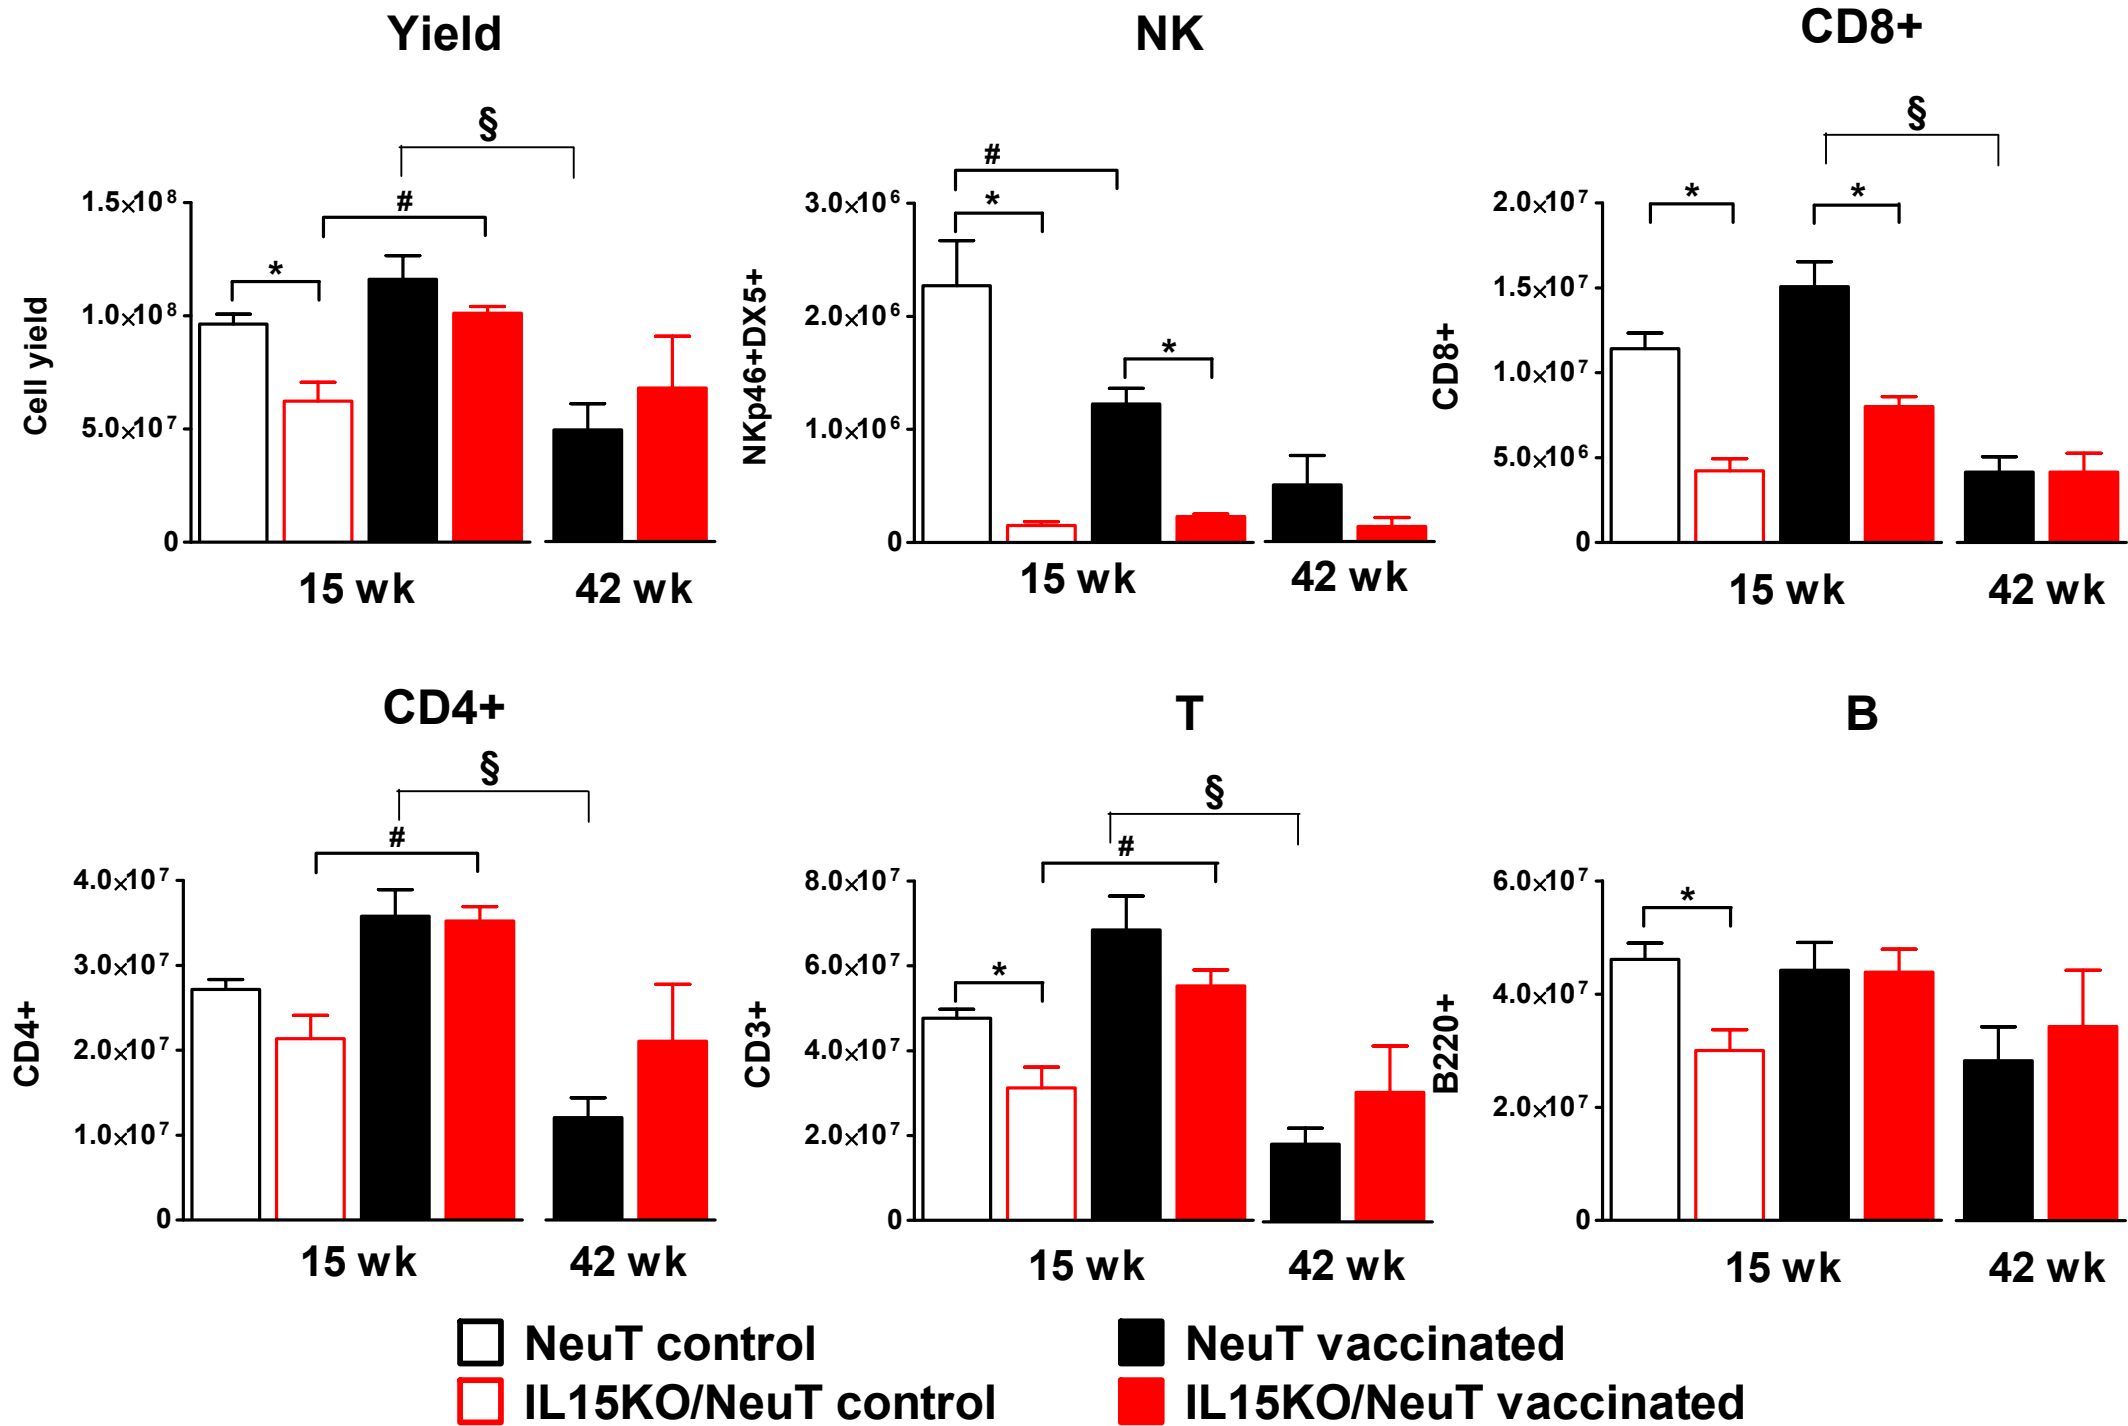

Supplement: MOESM3 [file 9781466]
